# Supplementary material
Source: publisher figshare collection journal article supplement (https://tandf.figshare.com/ndownloader/files/25517300)
Supplement: Supplementary file 1 [file 25517300]

**Table 5:** **Sources of collection of *Aframomum melegueta* and sex variables in the Asunafo-north municipality.**

| Sex |  |  | Source of collection | |  | X2 | Df | P-value |
| --- | --- | --- | --- | --- | --- | --- | --- | --- |
|  | | Cocoa farm | Oil palm farm | fallow land | Forest land (natural environment) |  |  |  |
| Male | | 1(6.3%) | 0.00% | 2(12.5%) | 13(81.3%) |  |  |  |
| Female | | 1(7.7%) | 1(7.7%) | 0.00% | 11(84.6%) |  |  |  |
| Total | | **6.90%** | **3.40%** | **6.90%** | **82.80%** | **2.89** | **3** | **0.410** |

**Table 6:** **Major challenges confronting *Aframomum melegueta* cultivation in Asunafo-north municipality.**

|  | Age |  | Challenges |  |  | X2 | Df | P-value |
| --- | --- | --- | --- | --- | --- | --- | --- | --- |
|  |  |  |  |  |  |  |  |  |
|  |  | Difficult to cultivate | Compete with other crops for nutrients | Lack of external market | Harbor insects |  |  |  |
|  | 18-30 | 1(25%) | 1(25%) | 2(50%) | 0.00% |  |  |  |
|  | 31-45 | 3(33.3%) | 4(44.4%) | 2(22.2%) | 0.00% |  |  |  |
|  | 46-60 | 3(27.3%) | 2(18.2%) | 4(36.4%) | 2(18.2%) |  |  |  |
|  | above 60 | 2(40%) | 1(20%) | 1(20%) | 1(20%) |  |  |  |
| Total |  | **9(30%)** | **8(26.7%)** | **10(33.3%)** | **3(10%)** | **7.21** | **12** | **0.84** |

**Table 7****: Relationship between education levels and preferred land use of *Aframomum melegueta* farmers.**

| Educational level |  | Preferred land use |  | X2 | Df | P-value |
| --- | --- | --- | --- | --- | --- | --- |
|  |  | |  |  |  |  |
|  | Fallow | Oil palm | Cocoa |  |  |  |
| Primary | 8(72.7%) | 2(18.2%) | 9.10% |  |  |  |
| Secondary | 3(100%) |  |  |  |  |  |
| Tertiary |  | 1(100%) |  |  |  |  |
| Illiterate | 6(75%) | 2(25%) |  |  |  |  |
| Total | **17(73.9%)** | **5(21.7%)** | **1(4.3%)** | **5.70** | **6** | **0.460** |

**Table 8:** **Age of farmers and knowledge of *Aframomum melegueta*.**

| Age | Knowledge on *Aframomum melegueta* |
| --- | --- |
|  |  |
|  |  |
| 18-30 | 4(13.3%) |
| 31-45 | 9(30%) |
| 46-60 | 11(36.6%) |
| above 60 | 5(16.6%) |
| Total | **30(100)** |
